# Supplementary material for: Seasonal InSAR Displacements Documenting the Active Layer Freeze and Thaw Progression in Central-Western Spitsbergen, Svalbard
Source: MDPI journal article supplement (doi:10.3390/rs13152977), 2021-07-28
Supplement: s1 [file s1]

Archive with 1 entries (1 files):
- remotesensing-1249429-SI.pdf
